# Supplementary material for: Structural diversity in manganese, iron and cobalt complexes of the ditopic 1,2-bis(2,2′-bipyridyl-6-yl)ethyne ligand and observation of epoxidation and catalase activity of manganese compounds
Source: Royal Society of Chemistry journal article supplement (doi:10.1039/b925129d), 2010-01-01
Supplement: b925129d.pdf [file b925129d.pdf]

### Electronic Supporting Information

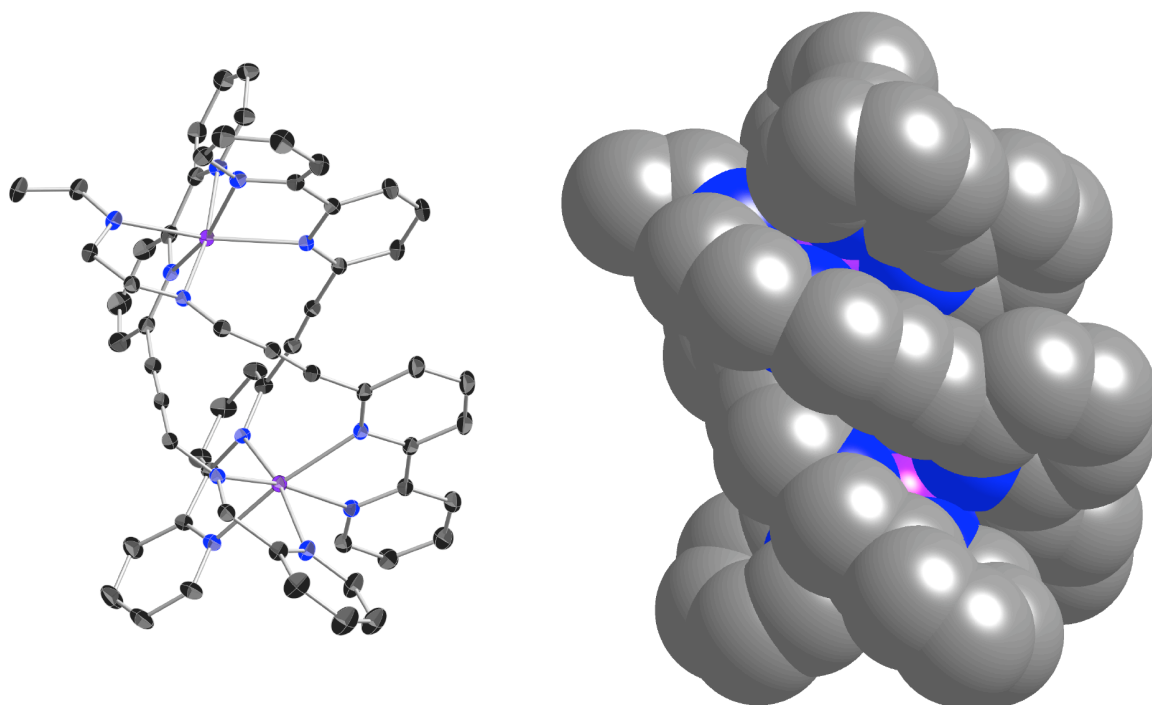

**Figure S1.** ORTEP Representation (50 % probability), left, and CPK representation, right, of  $5 [\text{Mn}_2\text{L}_3](\text{ClO}_4)_4 \cdot 1.7\text{CH}_3\text{CN} \cdot 1.65\text{EtOEt}$  (**5**) Carbon – grey; Nitrogen – blue; Manganese – purple. Hydrogen atoms, the  $\text{ClO}_4$  anions, and the acetonitrile and ether solvate molecule are not shown for clarity.

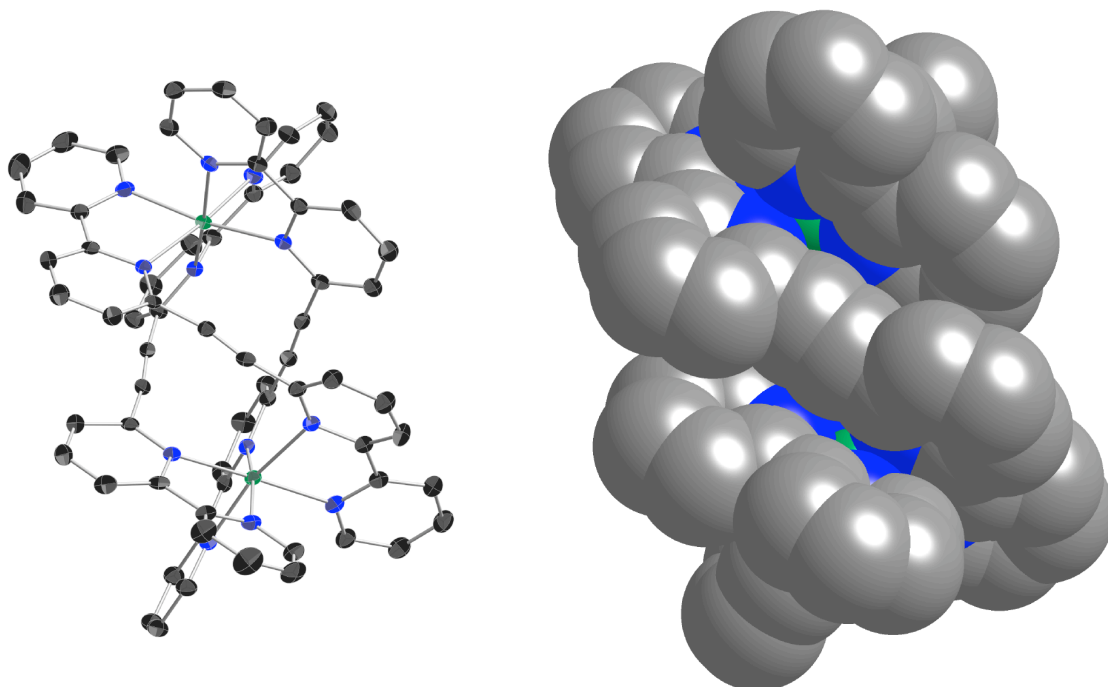

**Figure S2.** ORTEP Representation (50 % probability), left, and CPK representation, right, of  $[\text{Co}_2\text{L}_3](\text{ClO}_4)_4 \cdot 2\text{CH}_3\text{CN} \cdot 2\text{EtOEt}$  (**5**) Carbon – grey; Nitrogen – blue; Cobalt – green. Hydrogen atoms, the  $\text{ClO}_4$  anions, and the acetonitrile and ether solvate molecule are not shown for clarity.
